# Supplementary material for: Correspondence of directly reported and recalled health-related quality of life in a large heterogeneous sample of trauma patients
Source: Springer Nature journal article supplement (doi:10.1007/s11136-019-02256-z), 2019-07-30
Supplement: MOESM1 [file 17025048]

Online Resource 1. Mean EQ-5D summary score assessed 1 week (T1) and recall at 3 months (T2) post-injury and intraclass correlation coefficients (ICC)

|                                       | n                | EQ-5D assessed at T1<br>(1 week post-injury) | Recall EQ-5D assessed<br>at T2<br>(3 months post-injury) | P-value | ICC (95% CI)       |
|---------------------------------------|------------------|----------------------------------------------|----------------------------------------------------------|---------|--------------------|
| <b>Total</b>                          | 446 <sup>§</sup> | 0.482 (SD 0.30)                              | 0.453 (SD 0.34)                                          | 0.044*  | 0.575 (0.51, 0.63) |
| <b>Gender</b>                         |                  |                                              |                                                          |         |                    |
| Males                                 | 247              | 0.499 (SD 0.30)                              | 0.491 (SD 0.35)                                          | 0.694   | 0.564 (0.47, 0.64) |
| Females                               | 199              | 0.461 (SD 0.29)                              | 0.406 (SD 0.33)                                          | 0.007*  | 0.586 (0.49, 0.67) |
| <b>Age</b>                            |                  |                                              |                                                          |         |                    |
| <65 years                             | 231              | 0.457 (SD 0.29)                              | 0.415 (SD 0.34)                                          | 0.049*  | 0.498 (0.40, 0.59) |
| 65+ years                             | 215              | 0.509 (SD 0.30)                              | 0.494 (SD 0.34)                                          | 0.436   | 0.647 (0.56, 0.72) |
| <b>Educational level<sup>1</sup></b>  |                  |                                              |                                                          |         |                    |
| Low                                   | 97               | 0.495 (SD 0.34)                              | 0.486 (SD 0.36)                                          | 0.791   | 0.609 (0.47, 0.72) |
| Middle                                | 171              | 0.510 (SD 0.29)                              | 0.437 (SD 0.36)                                          | 0.003*  | 0.527 (0.41, 0.63) |
| High                                  | 171              | 0.435 (SD 0.27)                              | 0.443 (SD 0.32)                                          | 0.682   | 0.617 (0.52, 0.70) |
| <b>Comorbidity status<sup>2</sup></b> |                  |                                              |                                                          |         |                    |
| No comorbidity                        | 185              | 0.510 (SD 0.28)                              | 0.475 (SD 0.33)                                          | 0.119   | 0.505 (0.39, 0.61) |
| Comorbidity                           | 253              | 0.467 (SD 0.31)                              | 0.443 (SD 0.35)                                          | 0.209   | 0.598 (0.51, 0.67) |
| <b>Injury Severity Score</b>          |                  |                                              |                                                          |         |                    |
| ISS <16                               | 417              | 0.490 (SD 0.30)                              | 0.466 (SD 0.34)                                          | 0.086   | 0.573 (0.51, 0.64) |
| ISS ≥ 16                              | 29               | 0.359 (SD 0.31)                              | 0.278 (SD 0.38)                                          | 0.208   | 0.520 (0.20, 0.74) |

SD=standard deviation, ICC=Intraclass correlation coefficient, ISS=injury severity score

<sup>§</sup> Patients who completed the EQ-5D at 1 week and recall of 1 week at 3 months and 12 months, and EQ-5D at 3 months and recall of 3 months at 12 months after sustaining an injury

\* p<0.05

<sup>1</sup>7 missing values, <sup>2</sup>8 missing values

Online Resource 2. Mean EQ-5D summary score assessed 1 week (T1) and recall at 12 months (T3) post-injury and intraclass correlation coefficients (ICC)

|                                       | n                | EQ-5D assessed at T1<br>(1 week post-injury) | Recall EQ-5D assessed<br>at T3<br>(12 months post-injury) | P-value | ICC (95% CI)       |
|---------------------------------------|------------------|----------------------------------------------|-----------------------------------------------------------|---------|--------------------|
| <b>Total</b>                          | 446 <sup>§</sup> | 0.482 (SD 0.30)                              | 0.363 (SD 0.38)                                           | <0.001* | 0.518 (0.45, 0.58) |
| <b>Gender</b>                         |                  |                                              |                                                           |         |                    |
| Males                                 | 247              | 0.499 (SD 0.30)                              | 0.407 (SD 0.39)                                           | <0.001* | 0.543 (0.45, 0.63) |
| Females                               | 199              | 0.461 (SD 0.29)                              | 0.309 (SD 0.36)                                           | <0.001* | 0.477 (0.36, 0.58) |
| <b>Age</b>                            |                  |                                              |                                                           |         |                    |
| <65 years                             | 231              | 0.457 (SD 0.29)                              | 0.307 (SD 0.37)                                           | <0.001* | 0.475 (0.37, 0.57) |
| 65+ years                             | 215              | 0.509 (SD 0.30)                              | 0.423 (SD 0.38)                                           | <0.001* | 0.552 (0.45, 0.64) |
| <b>Educational level<sup>1</sup></b>  |                  |                                              |                                                           |         |                    |
| Low                                   | 97               | 0.495 (SD 0.34)                              | 0.383 (SD 0.40)                                           | 0.001*  | 0.627 (0.49, 0.73) |
| Middle                                | 171              | 0.510 (SD 0.29)                              | 0.348 (SD 0.38)                                           | <0.001* | 0.423 (0.29, 0.54) |
| High                                  | 171              | 0.435 (SD 0.27)                              | 0.358 (SD 0.37)                                           | 0.001*  | 0.548 (0.43, 0.64) |
| <b>Comorbidity status<sup>2</sup></b> |                  |                                              |                                                           |         |                    |
| No comorbidity                        | 185              | 0.510 (SD 0.27)                              | 0.381 (SD 0.37)                                           | <0.001* | 0.526 (0.41, 0.62) |
| Comorbidity                           | 253              | 0.467 (SD 0.31)                              | 0.349 (SD 0.38)                                           | <0.001* | 0.519 (0.42, 0.60) |
| <b>Injury Severity Score</b>          |                  |                                              |                                                           |         |                    |
| ISS <16                               | 417              | 0.490 (SD 0.30)                              | 0.380 (SD 0.38)                                           | <0.001* | 0.516 (0.44, 0.58) |
| ISS ≥ 16                              | 29               | 0.359 (SD 0.31)                              | 0.118 (SD 0.36)                                           | 0.015*  | 0.439 (0.09, 0.69) |

SD=standard deviation, ICC=Intraclass correlation coefficient, ISS=injury severity score

<sup>§</sup> Patients who completed the EQ-5D at 1 week and recall of 1 week at 3 months and 12 months, and EQ-5D at 3 months and recall of 3 months at 12 months after sustaining an injury

\* p<0.05

<sup>1</sup>7 missing values, <sup>2</sup>8 missing values

Online Resource 3. Mean EQ-5D summary score assessed 3 months (T2) and recall at 12 months (T3) post-injury and intraclass correlation coefficients (ICC)

|                                       | n                | EQ-5D assessed at T2<br>(3 months post-injury) | Recall EQ-5D assessed<br>at T3<br>(12 months post-injury) | P-value | ICC (95% CI)       |
|---------------------------------------|------------------|------------------------------------------------|-----------------------------------------------------------|---------|--------------------|
| <b>Total</b>                          | 446 <sup>§</sup> | 0.737 (SD 0.24)                                | 0.713 (SD 0.27)                                           | 0.022*  | 0.598 (0.54, 0.65) |
| <b>Gender</b>                         |                  |                                                |                                                           |         |                    |
| Males                                 | 247              | 0.744 (SD 0.23)                                | 0.727 (SD 0.27)                                           | 0.233   | 0.584 (0.50, 0.66) |
| Females                               | 199              | 0.729 (SD 0.24)                                | 0.696 (SD 0.26)                                           | 0.034*  | 0.614 (0.52, 0.69) |
| <b>Age</b>                            |                  |                                                |                                                           |         |                    |
| <65 years                             | 231              | 0.743 (SD 0.23)                                | 0.704 (SD 0.27)                                           | 0.006*  | 0.631 (0.55, 0.70) |
| 65+ years                             | 215              | 0.731 (SD 0.24)                                | 0.723 (SD 0.26)                                           | 0.611   | 0.564 (0.47, 0.65) |
| <b>Educational level<sup>1</sup></b>  |                  |                                                |                                                           |         |                    |
| Low                                   | 97               | 0.690 (SD 0.26)                                | 0.699 (SD 0.28)                                           | 0.684   | 0.671 (0.55, 0.77) |
| Middle                                | 171              | 0.742 (SD 0.23)                                | 0.697 (SD 0.28)                                           | 0.024*  | 0.483 (0.36, 0.59) |
| High                                  | 171              | 0.757 (SD 0.22)                                | 0.734 (SD 0.24)                                           | 0.115   | 0.673 (0.58, 0.75) |
| <b>Comorbidity status<sup>2</sup></b> |                  |                                                |                                                           |         |                    |
| No comorbidity                        | 185              | 0.784 (SD 0.23)                                | 0.778 (SD 0.22)                                           | 0.634   | 0.644 (0.55, 0.72) |
| Comorbidity                           | 253              | 0.705 (SD 0.23)                                | 0.666 (SD 0.28)                                           | 0.012*  | 0.547 (0.46, 0.63) |
| <b>Injury Severity Score</b>          |                  |                                                |                                                           |         |                    |
| ISS <16                               | 417              | 0.742 (SD 0.23)                                | 0.724 (SD 0.26)                                           | 0.097   | 0.594 (0.53, 0.65) |
| ISS ≥ 16                              | 29               | 0.672 (SD 0.28)                                | 0.556 (SD 0.30)                                           | 0.019*  | 0.614 (0.33, 0.80) |

SD=standard deviation, ICC=Intraclass correlation coefficient, ISS=injury severity score

<sup>§</sup>Patients who completed the EQ-5D at 1 week and recall of 1 week at 3 months and 12 months, and EQ-5D at 3 months and recall of 3 months at 12 months after sustaining an injury

\* p<0.05

<sup>1</sup>7 missing values, <sup>2</sup>8 missing values

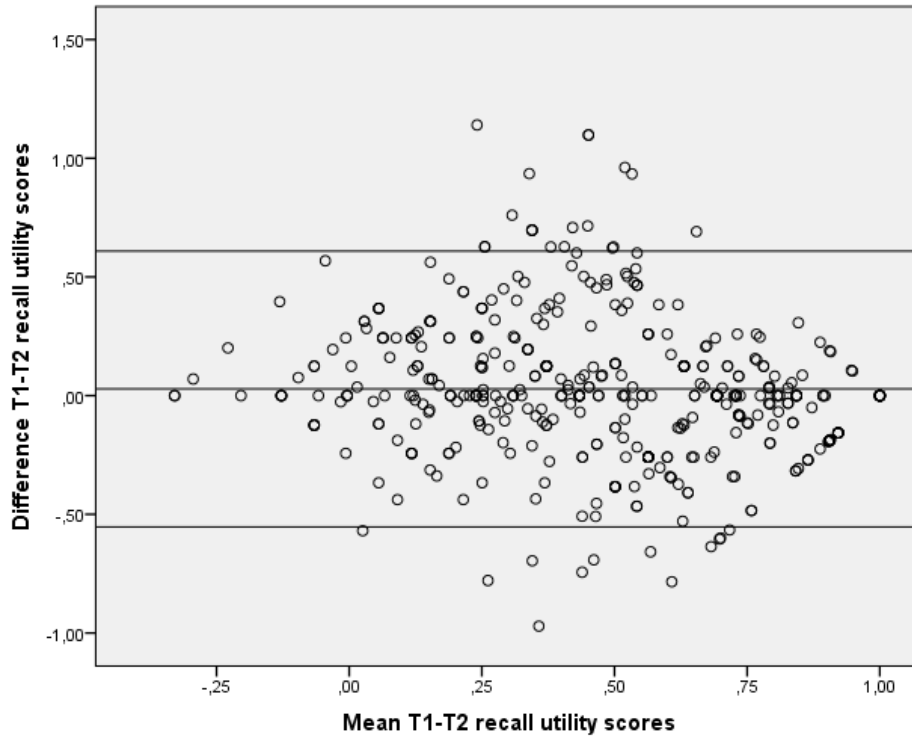

Online Resource 4. Bland-Altman plot for agreement T1 and T2 recall EQ-5D summary scores

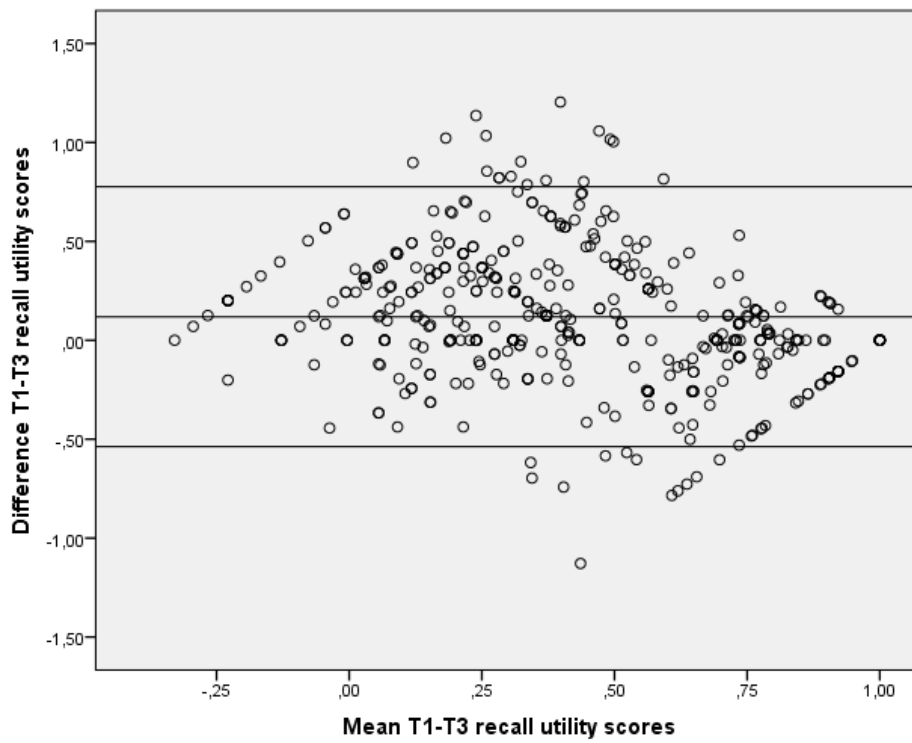

Online Resource 5. Bland-Altman plot for agreement T1 and T3 recall EQ-5D summary scores

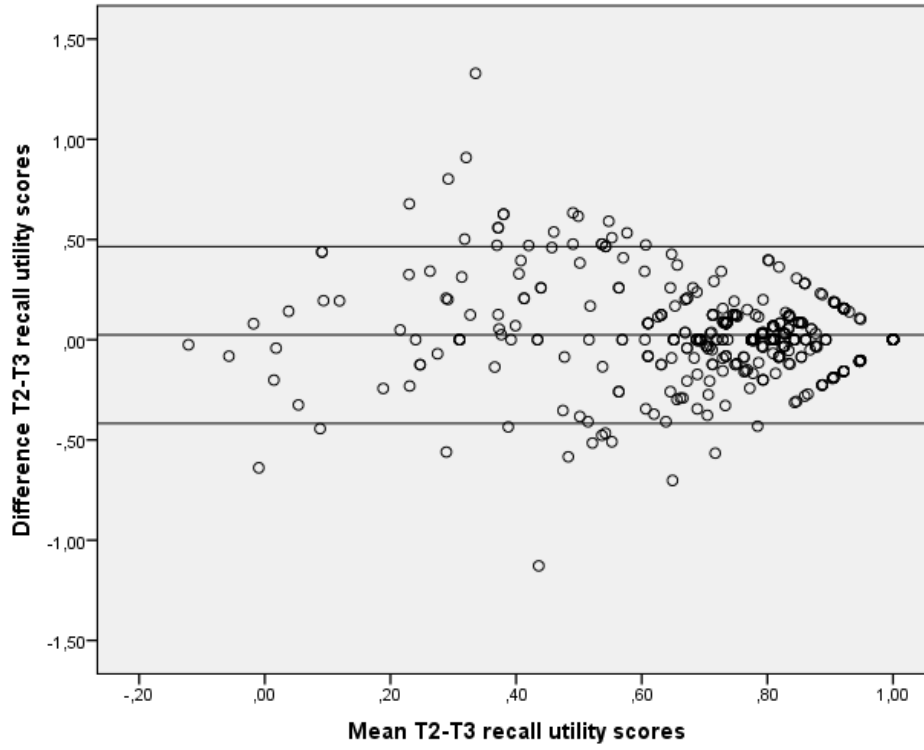

Online Resource 6. Bland-Altman plot for agreement T2 and T3 recall EQ-5D summary scores

Online Resource 7. Mean VAS scores assessed 1 week (T1) and recall at 3 months (T2) post-injury and intraclass correlation coefficients (ICC)

|                                       | n                | VAS assessed at T1<br>(1 week post-<br>injury) | VAS assessed at T2<br>(3 months post-<br>injury) | P-value | ICC                 |
|---------------------------------------|------------------|------------------------------------------------|--------------------------------------------------|---------|---------------------|
| <b>Total</b>                          | 446 <sup>§</sup> | 56.3 (SD 20)                                   | 55.4 (SD 21)                                     | 0.304   | 0.578 (0.51, 0.64)  |
| <b>Gender</b>                         |                  |                                                |                                                  |         |                     |
| Males                                 | 247              | 58.0 (SD 21)                                   | 56.7 (SD 22)                                     | 0.307   | 0.539 (0.44, 0.62)  |
| Females                               | 199              | 54.1 (SD 19)                                   | 53.7 (SD 19)                                     | 0.743   | 0.636 (0.55, 0.71)  |
| <b>Age</b>                            |                  |                                                |                                                  |         |                     |
| <65 years                             | 231              | 53.9 (SD 20)                                   | 50.7 (SD 21)                                     | 0.007*  | 0.614 (0.53, 0.69)  |
| 65+ years                             | 215              | 58.9 (SD 20)                                   | 60.4 (SD 20)                                     | 0.242   | 0.517 (0.41, 0.61)  |
| <b>Educational level<sup>1</sup></b>  |                  |                                                |                                                  |         |                     |
| Low                                   | 97               | 55.2 (SD 20)                                   | 56.2 (SD 21)                                     | 0.643   | 0.546 (0.39, 0.67)  |
| Middle                                | 171              | 58.2 (SD 20)                                   | 55.0 (SD 22)                                     | 0.038*  | 0.552 (0.44, 0.65)  |
| High                                  | 171              | 54.7 (SD 20)                                   | 54.8 (SD 20)                                     | 0.952   | 0.621 (0.52, 0.71)  |
| <b>Comorbidity status<sup>2</sup></b> |                  |                                                |                                                  |         |                     |
| No comorbidity                        | 185              | 57.7 (SD 19)                                   | 56.2 (SD 21)                                     | 0.273   | 0.548 (0.44, 0.64)  |
| Comorbidity                           | 253              | 55.4 (SD 20)                                   | 55.3 (SD 21)                                     | 0.925   | 0.568 (0.48, 0.65)  |
| <b>Injury Severity Score</b>          |                  |                                                |                                                  |         |                     |
| ISS <16                               | 417              | 57.2 (SD 20)                                   | 56.4 (SD 20)                                     | 0.374   | 0.597 (0.53, 0.66)  |
| ISS ≥ 16                              | 29               | 42.9 (SD 22)                                   | 40.0 (SD 24)                                     | 0.603   | 0.188 (-0.19, 0.51) |

SD=standard deviation, ICC=Intraclass correlation coefficient, ISS=injury severity score

<sup>§</sup> Patients who completed the EQ-5D at 1 week and recall of 1 week at 3 months and 12 months, and EQ-5D at 3 months and recall of 3 months at 12 months after sustaining an injury

\* p<0.05

<sup>1</sup>7 missing values, <sup>2</sup>8 missing values

Online Resource 8. Mean VAS scores assessed 1 week (T1) and recall at 12 months (T3) post-injury and intraclass correlation coefficients (ICC)

|                                       | n                | VAS assessed at T1<br>(1 week post-<br>injury) | VAS assessed at T3<br>(12 months post-<br>injury) | P-value | ICC                 |
|---------------------------------------|------------------|------------------------------------------------|---------------------------------------------------|---------|---------------------|
| <b>Total</b>                          | 446 <sup>§</sup> | 56.3 (SD 20)                                   | 53.3 (SD 23)                                      | 0.002*  | 0.561 (0.49, 0.62)  |
| <b>Gender</b>                         |                  |                                                |                                                   |         |                     |
| Males                                 | 247              | 58.0 (SD 21)                                   | 54.7 (SD 24)                                      | 0.016*  | 0.544 (0.45, 0.63)  |
| Females                               | 199              | 54.1 (SD 19)                                   | 51.4 (SD 22)                                      | 0.046*  | 0.579 (0.48, 0.66)  |
| <b>Age</b>                            |                  |                                                |                                                   |         |                     |
| <65 years                             | 231              | 53.9 (SD 20)                                   | 47.8 (SD 22)                                      | <0.001* | 0.555 (0.46, 0.64)  |
| 65+ years                             | 215              | 58.9 (SD 20)                                   | 59.1 (SD 23)                                      | 0.860   | 0.552 (0.45, 0.64)  |
| <b>Educational level<sup>1</sup></b>  |                  |                                                |                                                   |         |                     |
| Low                                   | 97               | 55.2 (SD 20)                                   | 54.4 (SD 25)                                      | 0.658   | 0.647 (0.52, 0.75)  |
| Middle                                | 171              | 58.2 (SD 20)                                   | 51.8 (SD 24)                                      | <0.001* | 0.434 (0.60, 0.55)  |
| High                                  | 171              | 54.7 (SD 20)                                   | 53.8 (SD 21)                                      | 0.491   | 0.652 (0.56, 0.73)  |
| <b>Comorbidity status<sup>2</sup></b> |                  |                                                |                                                   |         |                     |
| No comorbidity                        | 185              | 57.7 (SD 19)                                   | 55.4 (SD 23)                                      | 0.150   | 0.503 (0.39, 0.60)  |
| Comorbidity                           | 253              | 55.4 (SD 20)                                   | 51.8 (SD 23)                                      | 0.004*  | 0.576 (0.49, 0.65)  |
| <b>Injury Severity Score</b>          |                  |                                                |                                                   |         |                     |
| ISS <16                               | 417              | 57.2 (SD 20)                                   | 54.6 (SD 22)                                      | 0.007*  | 0.564 (0.50, 0.63)  |
| ISS ≥ 16                              | 29               | 42.9 (SD 22)                                   | 33.9 (SD 23)                                      | 0.082   | 0.292 (-0.08, 0.59) |

SD=standard deviation, ICC=Intraclass correlation coefficient, ISS=injury severity score

<sup>§</sup> Patients who completed the EQ-5D at 1 week and recall of 1 week at 3 months and 12 months, and EQ-5D at 3 months and recall of 3 months at 12 months after sustaining an injury

\* p<0.05

<sup>1</sup>7 missing values, <sup>2</sup>8 missing values

Online Resource 9. Mean VAS scores assessed 3 months (T2) and recall at 12 months (T3) post-injury and intraclass correlation coefficients (ICC)

|                                       | n                | VAS assessed at T2<br>(3 months post-<br>injury) | VAS assessed at T3<br>(12 months post-<br>injury) | P-value | ICC                |
|---------------------------------------|------------------|--------------------------------------------------|---------------------------------------------------|---------|--------------------|
| <b>Total</b>                          | 446 <sup>§</sup> | 72.5 (SD 17)                                     | 68.0 (SD 17)                                      | <0.001* | 0.595 (0.53, 0.65) |
| <b>Gender</b>                         |                  |                                                  |                                                   |         |                    |
| Males                                 | 247              | 73.0 (SD 17)                                     | 68.7 (SD 18)                                      | <0.001* | 0.642 (0.56, 0.71) |
| Females                               | 199              | 71.9 (SD 18)                                     | 67.1 (SD 17)                                      | <0.001* | 0.535 (0.43, 0.63) |
| <b>Age</b>                            |                  |                                                  |                                                   |         |                    |
| <65 years                             | 231              | 71.8 (SD 18)                                     | 65.2 (SD 18)                                      | <0.001* | 0.581 (0.49, 0.66) |
| 65+ years                             | 215              | 73.3 (SD 16)                                     | 71.0 (SD 17)                                      | 0.020*  | 0.618 (0.53, 0.69) |
| <b>Educational level<sup>1</sup></b>  |                  |                                                  |                                                   |         |                    |
| Low                                   | 97               | 69.6 (SD 17)                                     | 67.2 (SD 19)                                      | 0.166   | 0.561 (0.41, 0.68) |
| Middle                                | 171              | 74.2 (SD 17)                                     | 67.9 (SD 18)                                      | <0.001* | 0.512 (0.39, 0.62) |
| High                                  | 171              | 72.6 (SD 16)                                     | 68.6 (SD 17)                                      | <0.001* | 0.703 (0.62, 0.77) |
| <b>Comorbidity status<sup>2</sup></b> |                  |                                                  |                                                   |         |                    |
| No comorbidity                        | 185              | 76.6 (SD 17)                                     | 72.0 (SD 16)                                      | <0.001* | 0.627 (0.53, 0.71) |
| Comorbidity                           | 253              | 69.9 (SD 16)                                     | 65.1 (SD 18)                                      | <0.001* | 0.551 (0.46, 0.63) |
| <b>Injury Severity Score</b>          |                  |                                                  |                                                   |         |                    |
| ISS <16                               | 417              | 72.9 (SD 17)                                     | 68.8 (SD 17)                                      | <0.001* | 0.585 (0.52, 0.65) |
| ISS ≥ 16                              | 29               | 66.5 (SD 19)                                     | 56.6 (SD 18)                                      | 0.002*  | 0.657 (0.39, 0.82) |

SD=standard deviation, ICC=Intraclass correlation coefficient, ISS=injury severity score

<sup>§</sup> Patients who completed the EQ-5D at 1 week and recall of 1 week at 3 months and 12 months, and EQ-5D at 3 months and recall of 3 months at 12 months after sustaining an injury

\* p<0.05

<sup>1</sup>7 missing values, <sup>2</sup>8 missing values



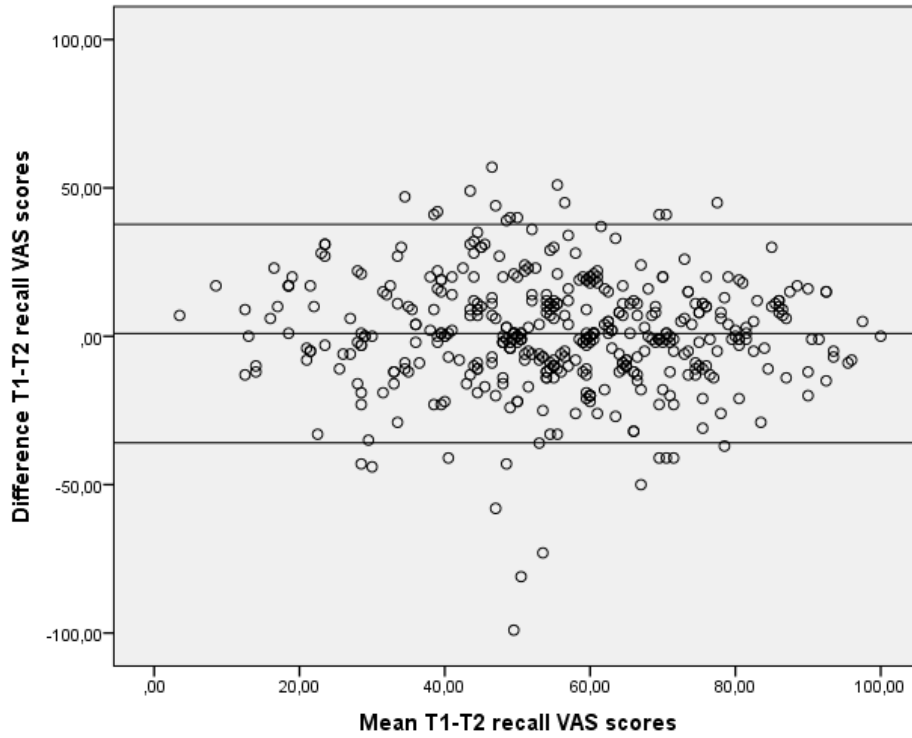

Online Resource 10. Bland-Altman plot for agreement T1 and T2 recall EQ-VAS scores

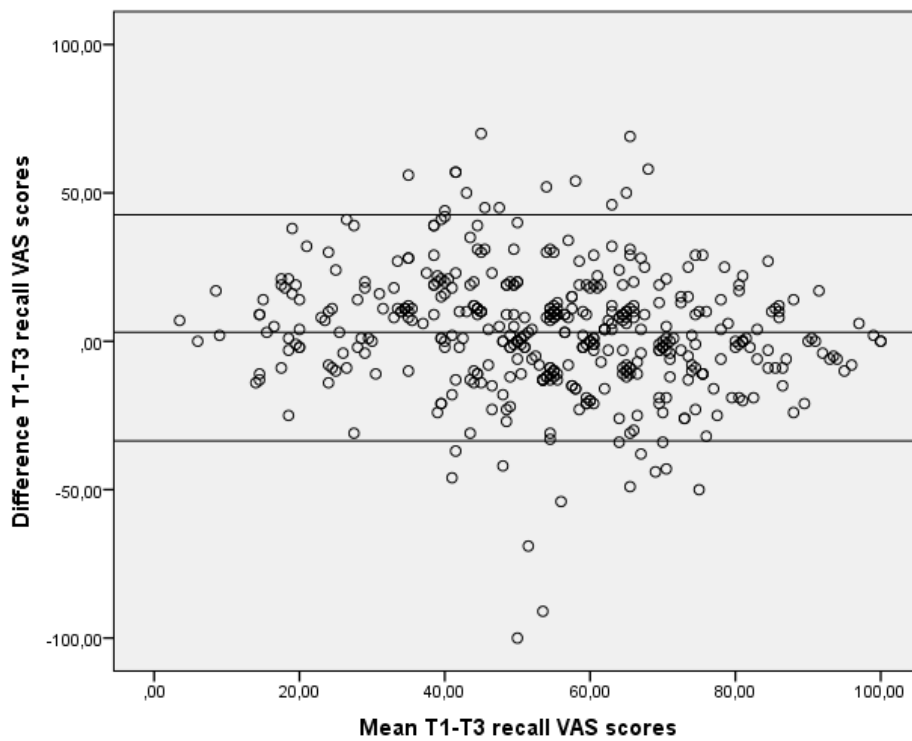

Online Resource 11. Bland-Altman plot for agreement T1 and T3 recall EQ-VAS scores

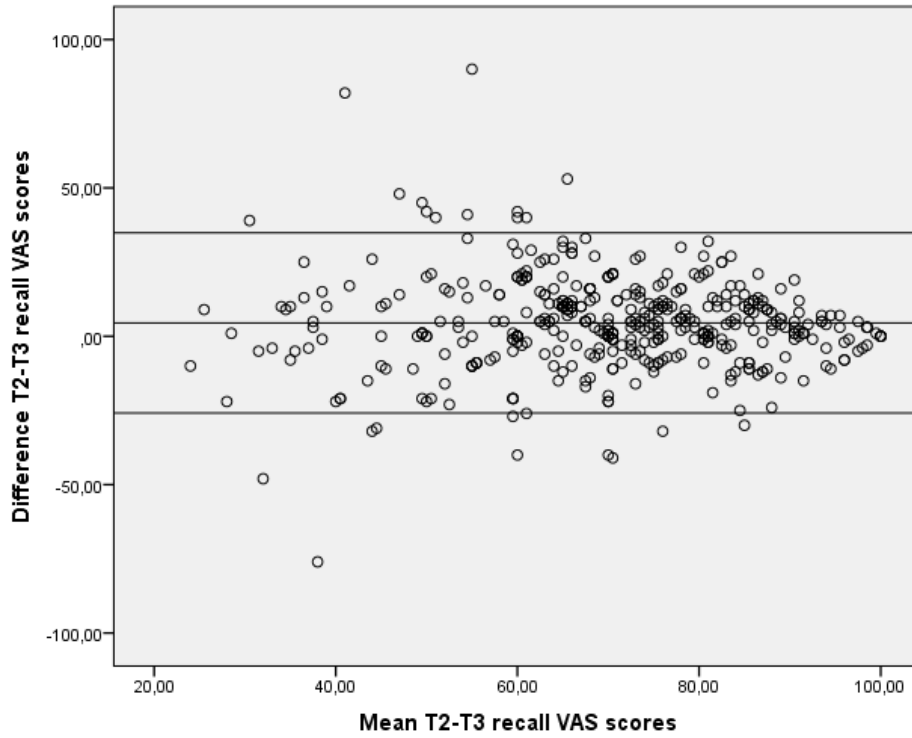

Online Resource 12. Bland-Altman plot for agreement T2 and T3 recall EQ-VAS scores
